# Supplementary material for: Synthesis and structures of some heterometallic [(Li, Y)2, (M3, Ce) (M = Li or Na), (Li, Zr2) and (Li, Zr)4] oligomeric diamides derived from 1,2-bis(neopentylamino)benzene
Source: Royal Society of Chemistry journal article supplement (doi:10.1039/b515790k), 2006-01-01
Supplement: b515790k.pdf [file b515790k.pdf]

## Synthesis and structures of some heterometallic [(Li, Y)<sub>2</sub>, (M<sub>3</sub>, Ce) (M = Li or Na), (Li, Zr<sub>2</sub>) and (Li, Zr)<sub>4</sub>] oligomeric diamides derived from 1,2-bis(neopentylamino)benzene

Peter B. Hitchcock, Qigu Huang, Michael F. Lappert,\* Xue-Hong Wei and Meisu Zhou

*Department of Chemistry, University of Sussex, Brighton, BN1 9QJ, UK; E-mail:*

*[m.f.lappert@sussex.ac.uk](mailto:m.f.lappert@sussex.ac.uk)*

The molecular structure of the crystalline alkali metal (Li/Na) tris(amido)cerate(III) [Ce{ $\mu$ - $\kappa^2$ -(NCH<sub>2</sub>Bu<sup>t</sup>)<sub>2</sub>C<sub>6</sub>H<sub>4</sub>-1,2}M]<sub>3</sub>·0.5Et<sub>2</sub>O (**4**) is illustrated in Fig. 1S. Selected geometric parameters (which are to be regarded with caution because of extensive disorder) are listed in Table 1S.

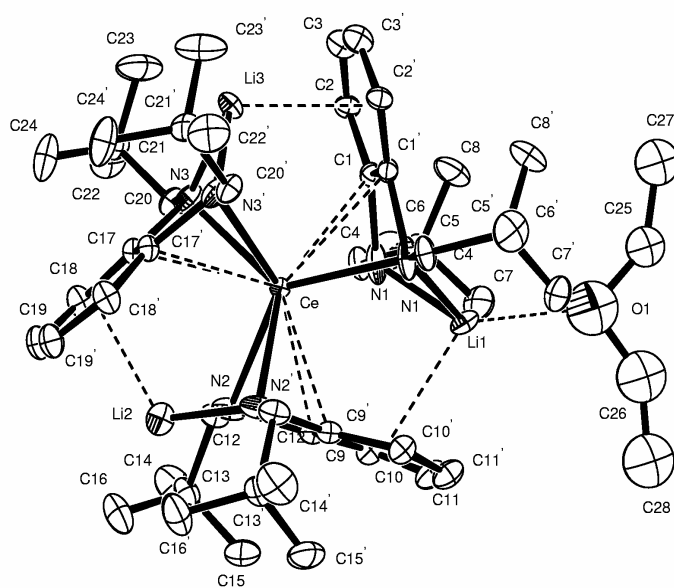

**Fig. 1S** The molecular structure of **4** (for “Li” read “M”)

**Table 1S** Selected bond lengths (Å) and angles (°) for **4**

|                  |            |                |            |
|------------------|------------|----------------|------------|
| Ce-N(1)          | 2.541(4)   | Li(3)-N(3)     | 2.139(9)   |
| Ce-N(2)          | 2.590(4)   | N(1)-C(1)      | 1.681(10)  |
| Ce-N(3)          | 2.545(4)   | N(1)-C(4)      | 1.454(6)   |
| Ce-C(1A)         | 2.753(7)   | N(2)-C(12)     | 1.457(5)   |
| Ce-C(9)          | 2.772(9)   | N(2)-C(9)      | 1.612(10)  |
| Ce-C(17A)        | 2.781(7)   | N(3)-C(17)     | 1.598(9)   |
| Li(1)-N(1)       | 2.191(9)   | N(3)-C(20)     | 1.457(5)   |
| Li(2)-N(2)       | 2.050(11)  | Li(1)-O(1)     | 2.456(11)  |
| Li(1)-N(1)-Ce    | 96.9(3)    | N(1)-Ce-N(3)   | 95.44(15)  |
| Li(2)-N(2)-Ce    | 87.5(4)    | N(3)-Ce-N(3)'  | 62.04(17)  |
| Li(3)-N(3)-Ce    | 90.6(3)    | N(2)-Ce-N(1)'  | 129.65(17) |
| N(1)'-Li(1)-N(1) | 73.6(4)    | N(1)-Ce-N(2)   | 96.67(16)  |
| N(2)'-Li(2)-N(2) | 79.3(5)    | N(2)-Ce-N(3)'  | 128.93(16) |
| N(3)'-Li(3)-N(3) | 75.6(4)    | N(2)-Ce-N(3)   | 96.18(15)  |
| N(1)'-Ce-N(1)    | 62.22(19)  | N(1)'-Ce-N(2)' | 96.67(16)  |
| N(1)'-Ce-N(3)'   | 95.44(15)  | N(1)-Ce-N(2)'  | 129.65(17) |
| N(1)-Ce-N(3)'    | 128.85(17) | N(2)'-Ce-N(3)' | 96.18(15)  |
| N(1)'-Ce-N(3)    | 128.85(17) | N(2)'-Ce-N(3)  | 128.93(16) |

Symmetry transformations to generate equivalent atoms: '  $x, y + 1/2, z$
